# Supplementary material for: Origin of Bluetongue Virus Serotype 8 Outbreak in Cyprus, September 2016
Source: MDPI journal article supplement (doi:10.3390/v12010096), 2020-01-14
Supplement: s1 [file s1]

**Table S1.** Historical reference strains of BTV sequenced during this study and associated Genbank accession number for the genome segments.

| <b>Isolate<br/>/Serotype</b> | <b>Passage<br/>sequenced</b> | <b>Seg-1<br/>(VP1)</b> | <b>Seg-2<br/>(VP2)</b> | <b>Seg-3<br/>(VP3)</b> | <b>Seg-4<br/>(VP4)</b> | <b>Seg-5<br/>(NS1)</b> | <b>Seg-6<br/>(VP5)</b> | <b>Seg-7<br/>(VP7)</b> | <b>Seg-8<br/>(NS2)</b> | <b>Seg-9<br/>(VP6)</b> | <b>Seg-10<br/>(NS3)</b> |
|------------------------------|------------------------------|------------------------|------------------------|------------------------|------------------------|------------------------|------------------------|------------------------|------------------------|------------------------|-------------------------|
| RSArrrr/05                   | E2BHK7                       | MN710093               | MN710209               | MN710122               | MN710151               | MN710180               | MN710238               | MN710267               | MN710296               | MN710325               | MN710354                |
| RSArrrr/07                   | E1BHK10                      | MN710094               | MN710210               | MN710123               | MN710152               | MN710181               | MN710239               | MN710268               | MN710297               | MN710326               | MN710355                |
| RSArrrr/10                   | BHK7                         | MN710095               | MN710211               | MN710124               | MN710153               | MN710182               | MN710240               | MN710269               | MN710298               | MN710327               | MN710356                |
| RSArrrr/11                   | E1BHK7                       | MN710096               | MN710212               | MN710125               | MN710154               | MN710183               | MN710241               | MN710270               | MN710299               | MN710328               | MN710357                |
| RSArrrr/12                   | E1BHK8                       | MN710097               | MN710213               | MN710126               | MN710155               | MN710184               | MN710242               | MN710271               | MN710300               | MN710329               | MN710358                |
| RSArrrr/13                   | E1/BHK7                      | MN710098               | MN710214               | MN710127               | MN710156               | MN710185               | MN710243               | MN710272               | MN710301               | MN710330               | MN710359                |
| RSArrrr/17                   | S3/E2/LK7/BHK11              | MN710099               | MN710215               | MN710128               | MN710157               | MN710186               | MN710244               | MN710273               | MN710302               | MN710331               | MN710360                |
| RSArrrr/18                   | E1/BHK8                      | MN710100               | MN710216               | MN710129               | MN710158               | MN710187               | MN710245               | MN710274               | MN710303               | MN710332               | MN710361                |
| RSArrrr/19                   | E3/BHK8                      | MN710101               | MN710217               | MN710130               | MN710159               | MN710188               | MN710246               | MN710275               | MN710304               | MN710333               | MN710362                |
| RSArrrr/20                   | E2/BHK1/CER1/BHK5            | MN710102               | MN710218               | MN710131               | MN710160               | MN710189               | MN710247               | MN710276               | MN710305               | MN710334               | MN710363                |
| RSArrrr/21                   | V3/BHK16                     | MN710103               | MN710219               | MN710132               | MN710161               | MN710190               | MN710248               | MN710277               | MN710306               | MN710335               | MN710364                |
| RSArrrr/22                   | E2/BHK1/CER1/BHK5            | MN710104               | MN710220               | MN710133               | MN710162               | MN710191               | MN710249               | MN710278               | MN710307               | MN710336               | MN710365                |
| RSArrrr/23                   | E1/CER2/BHK5                 | MN710105               | MN710221               | MN710134               | MN710163               | MN710192               | MN710250               | MN710279               | MN710308               | MN710337               | MN710366                |
